# Supplementary material for: New Insights of Potassium Sources Impacts as Foliar Application on ‘Canino’ Apricot Fruit Yield, Fruit Anatomy, Quality and Storability
Source: MDPI journal article supplement (doi:10.3390/plants10061163), 2021-06-08
Supplement: s1 [file s1]

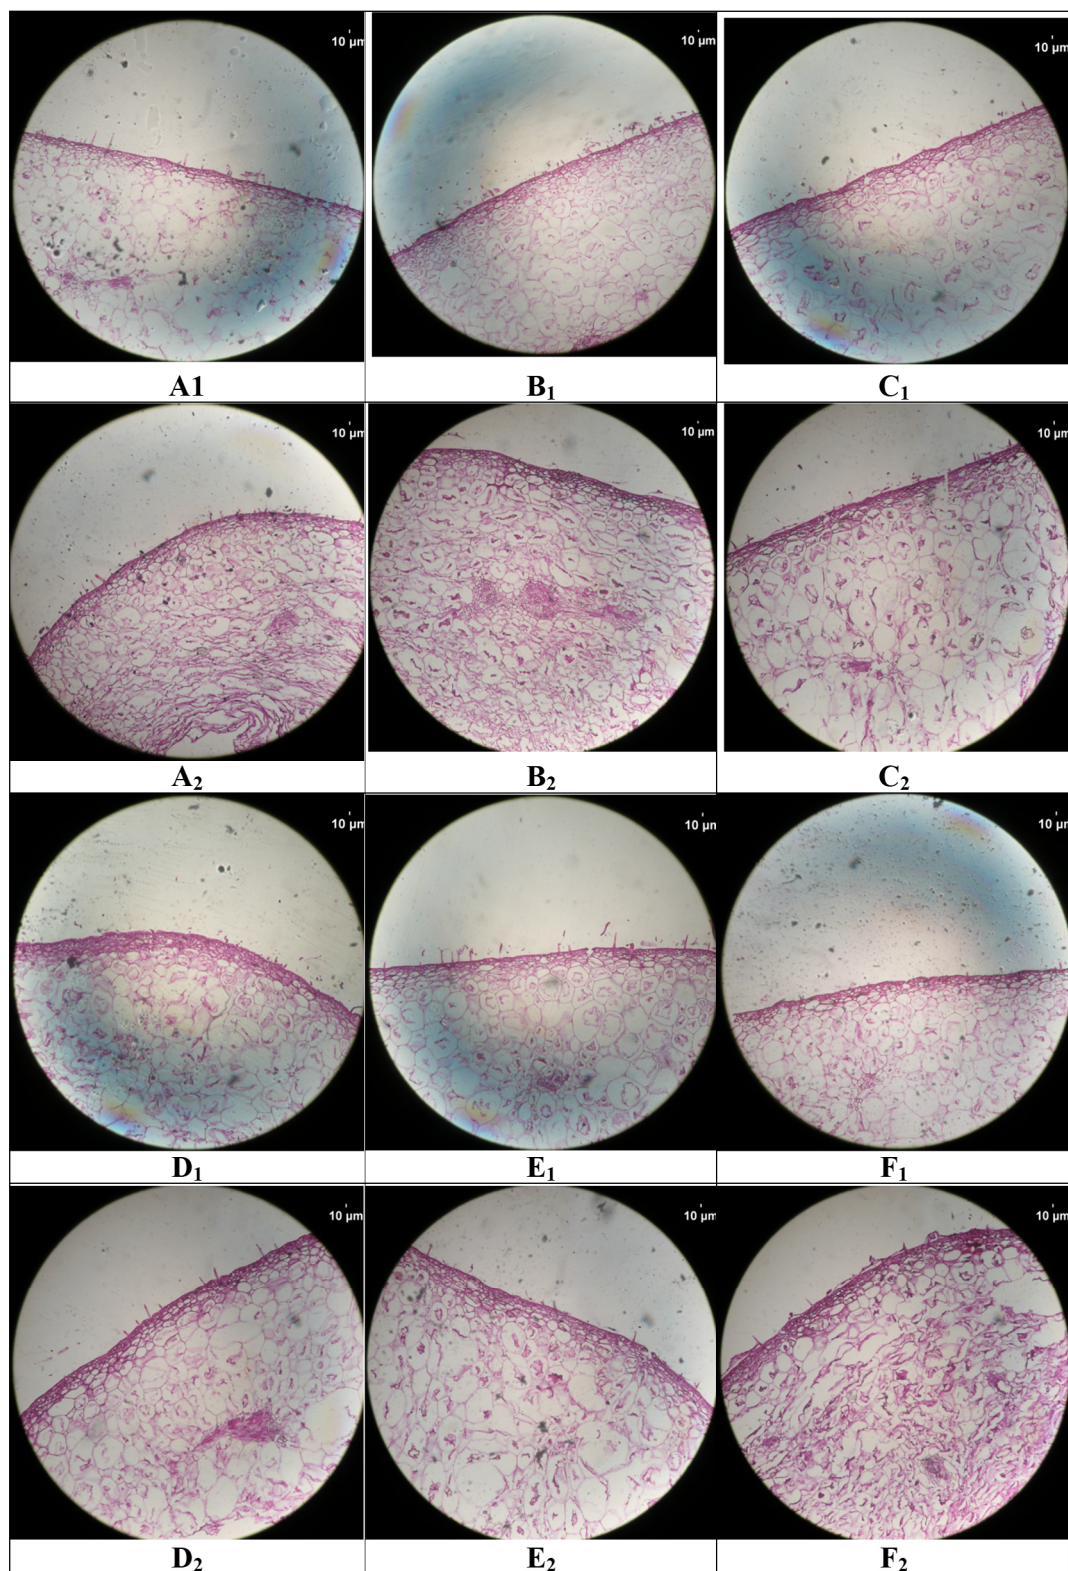

**Figure S1:** The effect of potassium sources on the cuticle, parenchyma cell and cell wall thickness of Canino apricot fruit tissue at harvest (A<sub>1</sub>,B<sub>1</sub>,C<sub>1</sub>,D<sub>1</sub>,E<sub>1</sub>,F<sub>1</sub>) and at the end of the storage period (A<sub>2</sub>,B<sub>2</sub>,C<sub>2</sub>,D<sub>2</sub>,E<sub>2</sub>,F<sub>2</sub>) and bar = 10 μm.. The letters given next to each photo belongs to the treatments in the order of control (A<sub>1</sub> and A<sub>2</sub>), k-Sulphate (B<sub>1</sub> and B<sub>2</sub>), k-nitrate (C<sub>1</sub> and C<sub>2</sub>), k-citrate (D<sub>1</sub> and D<sub>2</sub>), k-silicate (E<sub>1</sub> and E<sub>2</sub>) and k-humate (F<sub>1</sub> and F<sub>2</sub>) treatments, at harvest and at the end of the storage, respectively.(A<sub>2</sub>,B<sub>2</sub>,C<sub>2</sub>,D<sub>2</sub>,E<sub>2</sub>,F<sub>2</sub>) and bar = 10 μm.. (A<sub>2</sub> and F<sub>2</sub> show that the damage at end of cold storage was more evident in the mesocarp sub-epidermal tissue of the control and k-humate fruits, respectively).
